# Supplementary material
Source: Springer Nature journal article supplement (https://www.springermedizin.de/resource/supplementary/12885_2009_1651_MOESM6_ESM.pdf/9472554)

A

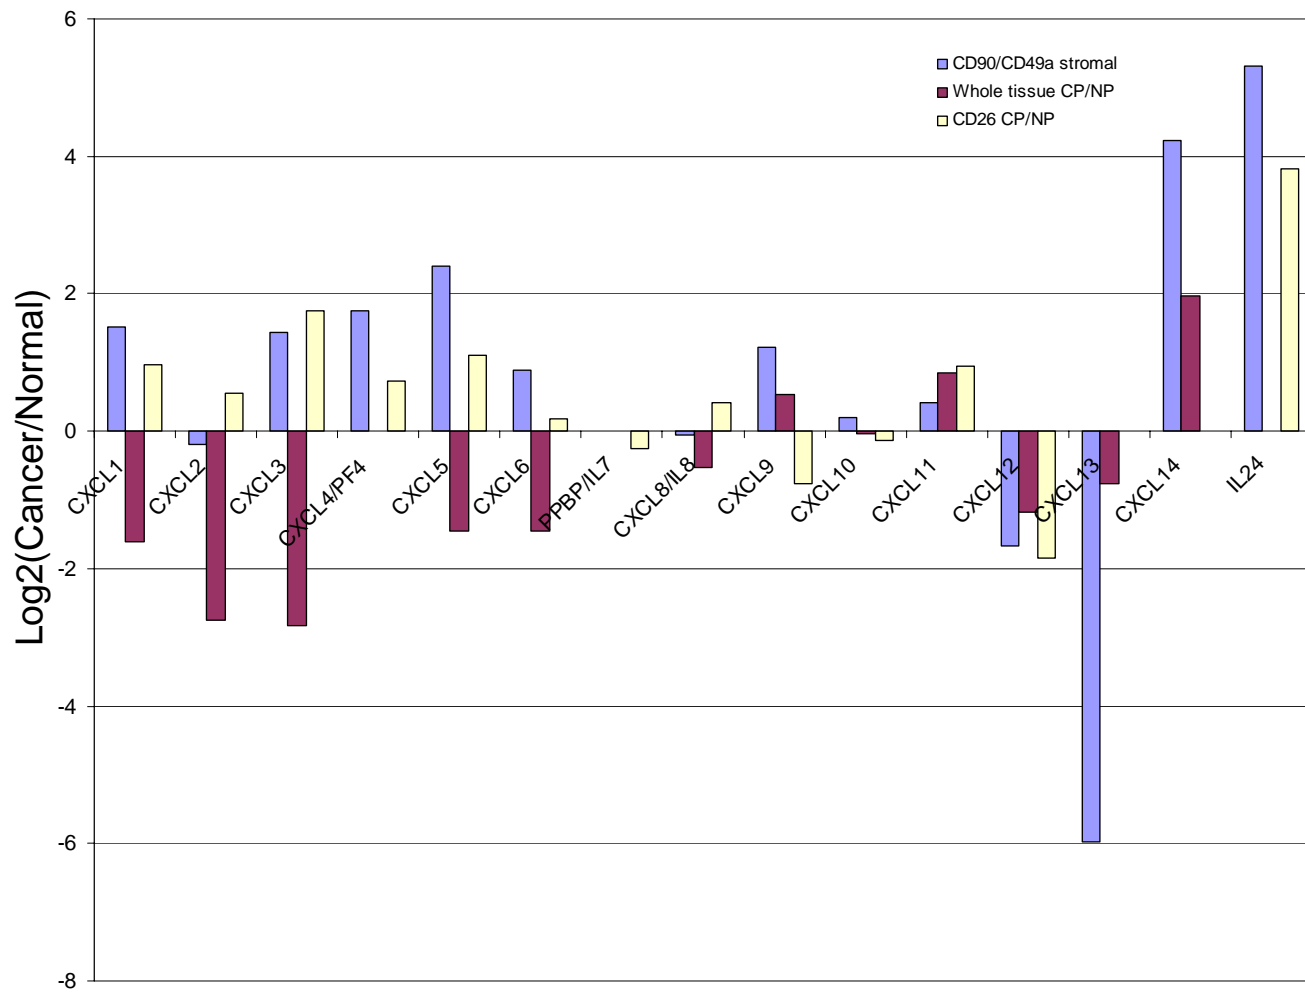

B

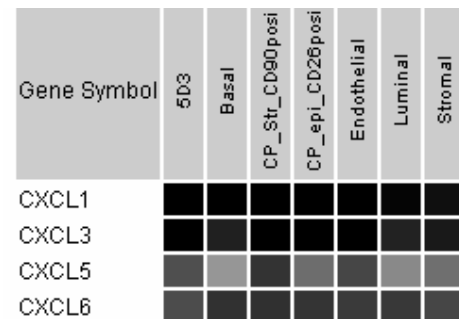

C

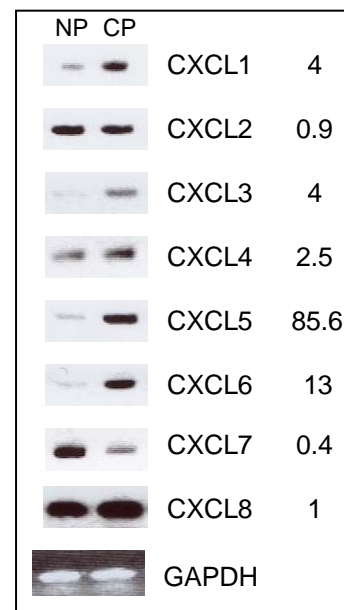

Supplement: MOESM6 [file 9472554]
